# Supplementary material for: A rapid method for extracting microplastics from oily food samples
Source: Royal Society of Chemistry journal article supplement (doi:10.1039/d2ay00792d), 2022-01-01
Supplement: d2ay00792d1.pdf [file d2ay00792d1.pdf]

## Supplementary Information

### A rapid method for extracting microplastics in oily food samples\*

Cui-Lan Bai,<sup>a</sup> Ting-Ting Xu,<sup>a</sup> Ying Guo,<sup>†a</sup> and Huan-Ting Li\*<sup>b</sup>

<sup>a</sup> *Guangdong Key Laboratory of Environmental Pollution and Health, School of Environment, Jinan University, Guangzhou, 510632, China*

<sup>b</sup> *Department of Neurology, The Affiliated Hospital of Qingdao University, Qingdao, 266000, China*

**NO. OF TABLES:** 2

**NO. OF FIGURES:** 4

**NO. OF PAGES:** 7

---

\* Electronic supplementary information (ESI) available.

† Corresponding authors: School of Environment, Jinan University, Guangzhou, China.

E-mail: [yingguo2004@jnu.edu.cn](mailto:yingguo2004@jnu.edu.cn); Department of Neurology, The Affiliated Hospital of Qingdao University, Qingdao, E-mail: [lihuanting26@163.com](mailto:lihuanting26@163.com)

**Table S1.** Weight change of cellulose nitrate membranes treated with different organic reagents

| Organic reagents  | Weight change (%) (mean $\pm$ sd) | P value | T value | 95% confidence interval of the difference (%) |
|-------------------|-----------------------------------|---------|---------|-----------------------------------------------|
| Hexanes           | +0.02 $\pm$ 0.01                  | 0.07    | 3.50    | (-0.01, 0.05)                                 |
| Dichloromethane   | +0.02 $\pm$ 0.04                  | 0.44    | 0.96    | (-0.07, 0.11)                                 |
| Methylbenzene     | -0.02 $\pm$ 0.06                  | 0.60    | -0.62   | (-0.16, 0.12)                                 |
| Isopropyl alcohol | +0.04 $\pm$ 0.02                  | 0.09    | 3.05    | (-0.02, 0.09)                                 |

**Table S2.** Weight change of microplastics treated by hexane and dichloromethane (DCM)

| MPs    | Weight change (%) (mean $\pm$ sd) | P value      | T value | 95% confidence interval of the difference (%) |
|--------|-----------------------------------|--------------|---------|-----------------------------------------------|
| Hexane |                                   |              |         |                                               |
| PE     | +0.36 $\pm$ 0.25 <sup>d</sup>     | 0.14         | 2.42    | (-0.28, 0.99)                                 |
| PET    | -0.49 $\pm$ 1.20                  | 0.55         | -0.71   | (-3.48, 2.49)                                 |
| PP     | +0.06 $\pm$ 0.03                  | 0.06         | 3.93    | (-0.01, 0.13)                                 |
| PS     | +0.30 $\pm$ 0.13                  | 0.06         | 3.93    | (-0.03, 0.63)                                 |
| DCM    |                                   |              |         |                                               |
| PE     | -0.08 $\pm$ 0.21                  | 0.60         | -0.63   | (-0.60, 0.45)                                 |
| PET    | -0.01 $\pm$ 0.22                  | 0.51         | -0.81   | (-0.66, 0.45)                                 |
| PP     | +0.11 $\pm$ 0.05                  | 0.06         | 3.91    | (-0.01, 0.22)                                 |
| PS     | +9.73 $\pm$ 0.29                  | <            | 58.3    | (9.01,10.5)                                   |
|        |                                   | <b>0.001</b> |         |                                               |

**Table S3.** The amount of washing reagent for oils with different weights in food

| Oil (g)  | Hexane (mL) |
|----------|-------------|
| < 0.25   | 13.0        |
| 0.25–0.5 | 15.0        |
| 0.5–1.0  | 30.0        |
| 1.0–1.5  | 35.0        |

**Table S4.** Recovery rates of microplastics in food mixed with different types of oil

|                          | Recovery rates      |                    |                     |                    |                    |                     |
|--------------------------|---------------------|--------------------|---------------------|--------------------|--------------------|---------------------|
|                          | 400- $\mu$ m<br>PET | 500- $\mu$ m<br>PE | 500- $\mu$ m<br>PET | 500- $\mu$ m<br>PP | 500- $\mu$ m<br>PS | 1000- $\mu$ m<br>PP |
| Flour + Animal<br>oil    | 97% $\pm$<br>8%     | 97% $\pm$<br>14%   | 100% $\pm$<br>6%    | 93% $\pm$<br>14%   | 102% $\pm$<br>8%   | 100% $\pm$ 0        |
| Flour +<br>Vegetable oil | 93% $\pm$<br>10%    | 88% $\pm$<br>26%   | 97% $\pm$<br>8%     | 92% $\pm$<br>8%    | 90% $\pm$<br>11%   | 92% $\pm$<br>10%    |
| Flour + Mixed<br>oil     | 90% $\pm$<br>9%     | 98% $\pm$<br>13%   | 98% $\pm$<br>12%    | 93% $\pm$<br>15%   | 92% $\pm$<br>8%    | 97% $\pm$<br>5%     |
| Mean + SD                | 93% $\pm$<br>9%     | 94% $\pm$<br>18%   | 98% $\pm$<br>9%     | 93% $\pm$<br>12%   | 94% $\pm$<br>10%   | 96% $\pm$<br>7%     |

**Table S5.** The comparison of recoveries in different particle sizes of the same microplastics

| MPs                                    | Mean<br>difference | P value | T value | 95% confidence<br>interval of the<br>difference |
|----------------------------------------|--------------------|---------|---------|-------------------------------------------------|
| 400- $\mu$ m PET &<br>500- $\mu$ m PET | -5.0               | 0.10    | -1.70   | (-11.0, 0.98)                                   |
| 500- $\mu$ m PET &<br>1000- $\mu$ m PP | -3.3               | 0.31    | -1.03   | (-9.95, 3.28)                                   |

**Table S6.** The comparison of recoveries in different oil of the same microplastics

| MPs                 | Oil                        | Mean difference | P value     | T value | 95% confidence interval of the difference |
|---------------------|----------------------------|-----------------|-------------|---------|-------------------------------------------|
| 400- $\mu$ m<br>PET | Animal oil & Vegetable oil | 3.33            | 0.55        | 0.62    | (-8.64, 15.3)                             |
|                     | Animal oil & Mixed oil     | 6.67            | 0.21        | 1.35    | (-4.35, 17.7)                             |
|                     | Vegetable oil & Mixed oil  | 3.33            | 0.56        | 0.60    | (-9.09, 15.8)                             |
| 500- $\mu$ m<br>PET | Animal oil & Vegetable oil | 3.33            | 0.45        | 0.79    | (-6.06, 12.7)                             |
|                     | Animal oil & Mixed oil     | 1.67            | 0.77        | 0.31    | (-10.4, 13.8)                             |
|                     | Vegetable oil & Mixed oil  | -1.67           | 0.78        | -0.29   | (-14.6, 11.3)                             |
| 500- $\mu$ m<br>PE  | Animal oil & Vegetable oil | 8.33            | 0.51        | 0.69    | (-18.7, 35.4)                             |
|                     | Animal oil & Mixed oil     | -1.67           | 0.84        | -0.21   | (-19.0, 15.8)                             |
|                     | Vegetable oil & Mixed oil  | -10.0           | 0.43        | -0.83   | (-36.9, 16.9)                             |
| 500- $\mu$ m<br>PS  | Animal oil & Vegetable oil | 11.7            | 0.06        | 2.15    | (-0.42, 23.8)                             |
|                     | Animal oil & Mixed oil     | 10.0            | <b>0.04</b> | 2.30    | (0.32, 19.7)                              |
|                     | Vegetable oil & Mixed oil  | -1.67           | 0.77        | -0.31   | (-13.8, 10.4)                             |
| 500- $\mu$ m<br>PP  | Animal oil & Vegetable oil | 1.67            | 0.80        | 0.26    | (-12.5, 15.9)                             |
|                     | Animal oil & Mixed oil     | 0.00            | 1.00        | < 0.001 | (-18.5, 18.5)                             |
|                     | Vegetable oil & Mixed oil  | -1.67           | 0.81        | -0.24   | (-17.0, 13.6)                             |
| 1000- $\mu$ m<br>PP | Animal oil & Vegetable oil | 8.33            | 0.09        | 2.08    | (-1.98, 18.7)                             |
|                     | Animal oil & Mixed oil     | 3.33            | 0.18        | 1.58    | (-2.09, 8.75)                             |
|                     | Vegetable oil & Mixed oil  | -5.00           | 0.30        | -1.10   | (-15.6, 5.56)                             |

**Table S7.** Degradation effect of applied digestion and washing procedure on tested microplastics

| Type                   | No. <sup>a</sup> | Color change                  | Spectral matching index | Other change        |
|------------------------|------------------|-------------------------------|-------------------------|---------------------|
| 400- $\mu\text{m}$ PET | 6                | – <sup>b</sup>                | > 0.90                  | –                   |
| 500- $\mu\text{m}$ PE  | 6                | –                             | > 0.90                  | –                   |
| 500- $\mu\text{m}$ PET | 6                | –                             | > 0.90                  | –                   |
| 500- $\mu\text{m}$ PP  | 6                | –                             | > 0.90                  | –                   |
| 500- $\mu\text{m}$ PS  | 6                | transparent →<br>light yellow | ~ 0.60                  | slight<br>corrosion |
| 1000- $\mu\text{m}$ PP | 6                | –                             | > 0.90                  | –                   |

a: Number of parallel samples

b: No changes was found on microplastics before and after treatment

**Table S8.** Change of particle size (mean  $\pm$  sd) of common polymer types before and after treatment

| MPs                    | Change of particle size ( $\mu\text{m}$ ) | P value | T value | 95% confidence interval of the difference |
|------------------------|-------------------------------------------|---------|---------|-------------------------------------------|
| 400- $\mu\text{m}$ PET | -0.17 $\pm$ 76.9                          | 0.99    | -0.01   | (-29.7, 29.4)                             |
| 500- $\mu\text{m}$ PET | -12.2 $\pm$ 93.9                          | 0.51    | -0.67   | (-49.1, 24.6)                             |
| 500- $\mu\text{m}$ PE  | 29.2 $\pm$ 96.7                           | 0.06    | 1.94    | (-0.99, 59.3)                             |
| 500- $\mu\text{m}$ PS  | -14.6 $\pm$ 64.0                          | 0.21    | -1.27   | (-37.7, 8.42)                             |
| 500- $\mu\text{m}$ PP  | -23.6 $\pm$ 101                           | 0.28    | -1.08   | (-67.4, 20.1)                             |
| 1000- $\mu\text{m}$ PP | -23.5 $\pm$ 156                           | 0.40    | -0.84   | (-79.8, 32.7)                             |

**Table S9.** Change of surface area (mean  $\pm$  sd) of common polymer types before and after treatment

| MPs                    | Change of surface area ( $\text{mm}^2$ ) | P value | T value | 95% confidence interval of the difference |
|------------------------|------------------------------------------|---------|---------|-------------------------------------------|
| 400- $\mu\text{m}$ PET | 0.03 $\pm$ 0.11                          | 0.20    | 1.29    | (-0.01, 0.07)                             |
| 500- $\mu\text{m}$ PET | -0.03 $\pm$ 0.13                         | 0.26    | -1.14   | (-0.07, 0.02)                             |
| 500- $\mu\text{m}$ PE  | 0.05 $\pm$ 0.15                          | 0.11    | 1.61    | (-0.01, 0.10)                             |
| 500- $\mu\text{m}$ PS  | -0.02 $\pm$ 0.05                         | 0.06    | -1.95   | (-0.04, 0.0005)                           |
| 500- $\mu\text{m}$ PP  | -0.002 $\pm$ 0.15                        | 0.95    | -0.06   | (-0.06, 0.06)                             |
| 1000- $\mu\text{m}$ PP | 0.04 $\pm$ 0.23                          | 0.26    | 1.14    | (-0.03, 0.12)                             |

**Table S10.** 95% confidence interval for the mean of surface area and particle size of common polymer types before and after treatment

| MPs                    | Surface area ( $\text{mm}^2$ ) |                 | Particle size ( $\mu\text{m}$ ) |                 |
|------------------------|--------------------------------|-----------------|---------------------------------|-----------------|
|                        | Before treatment               | After treatment | Before treatment                | After treatment |
| 400- $\mu\text{m}$ PET | (0.25, 0.32)                   | (0.24, 0.28)    | (418, 460)                      | (415, 460)      |
| 500- $\mu\text{m}$ PET | (0.25, 0.29)                   | (0.25, 0.34)    | (444, 487)                      | (444, 508)      |
| 500- $\mu\text{m}$ PE  | (0.47, 0.55)                   | (0.41, 0.50)    | (633, 677)                      | (604, 649)      |
| 500- $\mu\text{m}$ PS  | (0.18, 0.20)                   | (0.19, 0.22)    | (449, 480)                      | (464, 499)      |
| 500- $\mu\text{m}$ PP  | (0.60, 0.67)                   | (0.58, 0.69)    | (652, 710)                      | (669, 739)      |
| 1000- $\mu\text{m}$ PP | (0.90, 0.99)                   | (0.84, 0.96)    | (891, 948)                      | (893, 992)      |

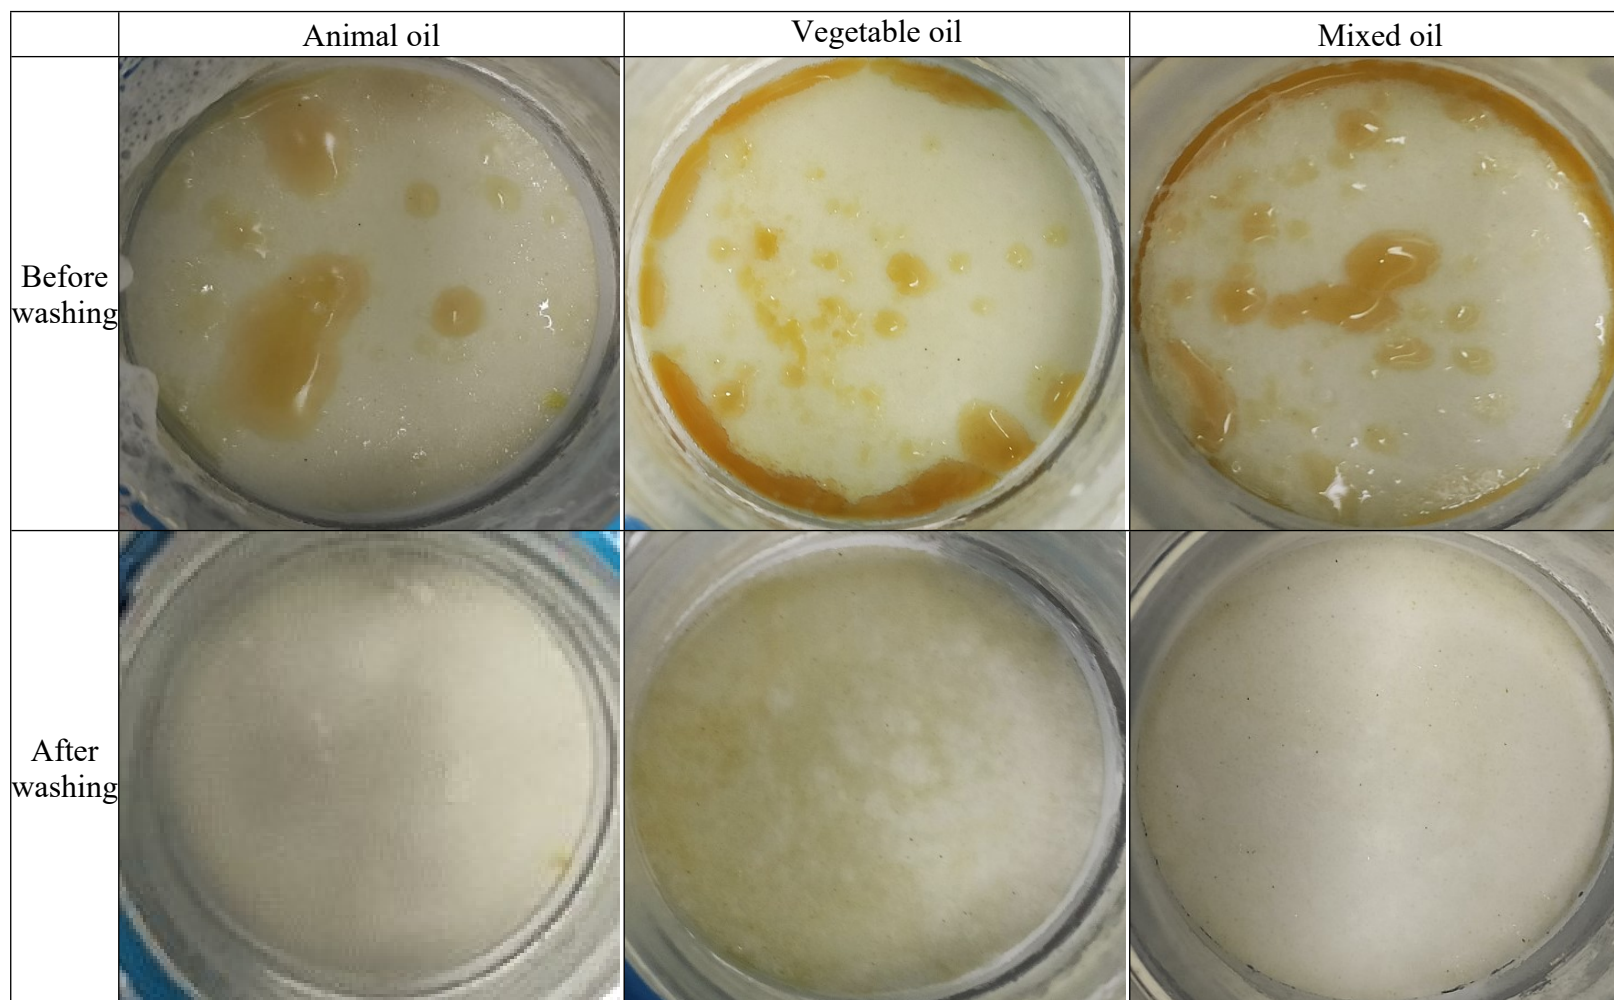

**Fig.S1.** The comparison of oil on cellulose nitrate membranes before and after hexane washing
